# Supplementary material for: FimH confers mannose-targeting ability to Bacillus Calmette-Guerin for improved immunotherapy in bladder cancer
Source: PubMed Central journal article supplement — J Immunother Cancer. 2022 Mar 31;10(3):e003939. doi: 10.1136/jitc-2021-003939 (PMC8971803; doi:10.1136/jitc-2021-003939), 2022-03-31
Supplement: jitc-2021-003939supp001.pdf [file jitc-2021-003939supp001.pdf]

## Supplementary Information for

### **FimH confers mannose-targeting ability to Bacillus Calmette-Guerin for improved immunotherapy in bladder cancer**

Yang Zhang, Fan Huo, Qiang Cao, Ru Jia, Qiju Huang, Zhu A. Wang, Dan Theodorescu, Qiang Lv, Pengchao Li, Chao Yan

Corresponding authors: Qiang Lv, Pengchao Li, Chao Yan (yanchao@nju.edu.cn).

#### **This PDF file includes:**

Figures S1 to S7

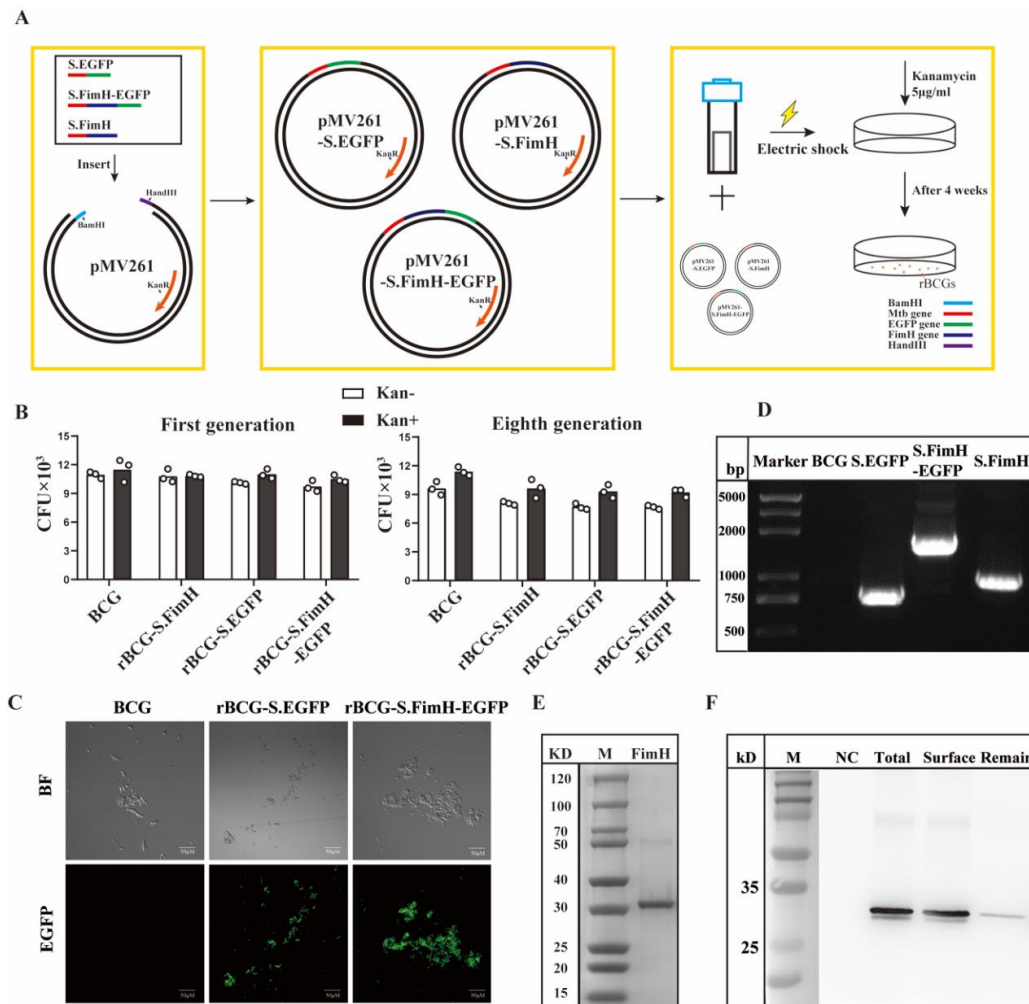

**Supplementary Figure S1. Generation and characterization of recombinant BCG overexpressing the FimH protein on the outer surface.** (A) Schematic representation of the construction process of rBCG.FimH, rBCG-S.EGFP and rBCG-S.FimH-EGFP. (B) Stability testing of all recombinant BCG strains. BCG were cultured with or without the kanamycin selection pressure. All the recombinant strains were stable after eight generations even without kanamycin selection. (C) Fluorescence microscopy analysis of BCG strains. Positive green fluorescence signal indicated the successful construction of recombinant BCG expressing S.EGFP or S.FimH-EGFP. BF: bright field. Scale bar: 50 µm. (D) RT-PCR analysis of FimH mRNA levels in recombinant BCG overexpressing S.EGFP, S.FimH-EGFP or S.FimH. (E) pET28a-FimH plasmids were transfected into BL21 and the FimH protein was purified on a nickel column for the generation of rabbit polyclonal antibodies. Shown is the purified FimH separated on SDS-PAGE. (F) Immunoblotting result showing the successful expression of FimH protein on the surface of rBCG-S.FimH. NC: BCG.

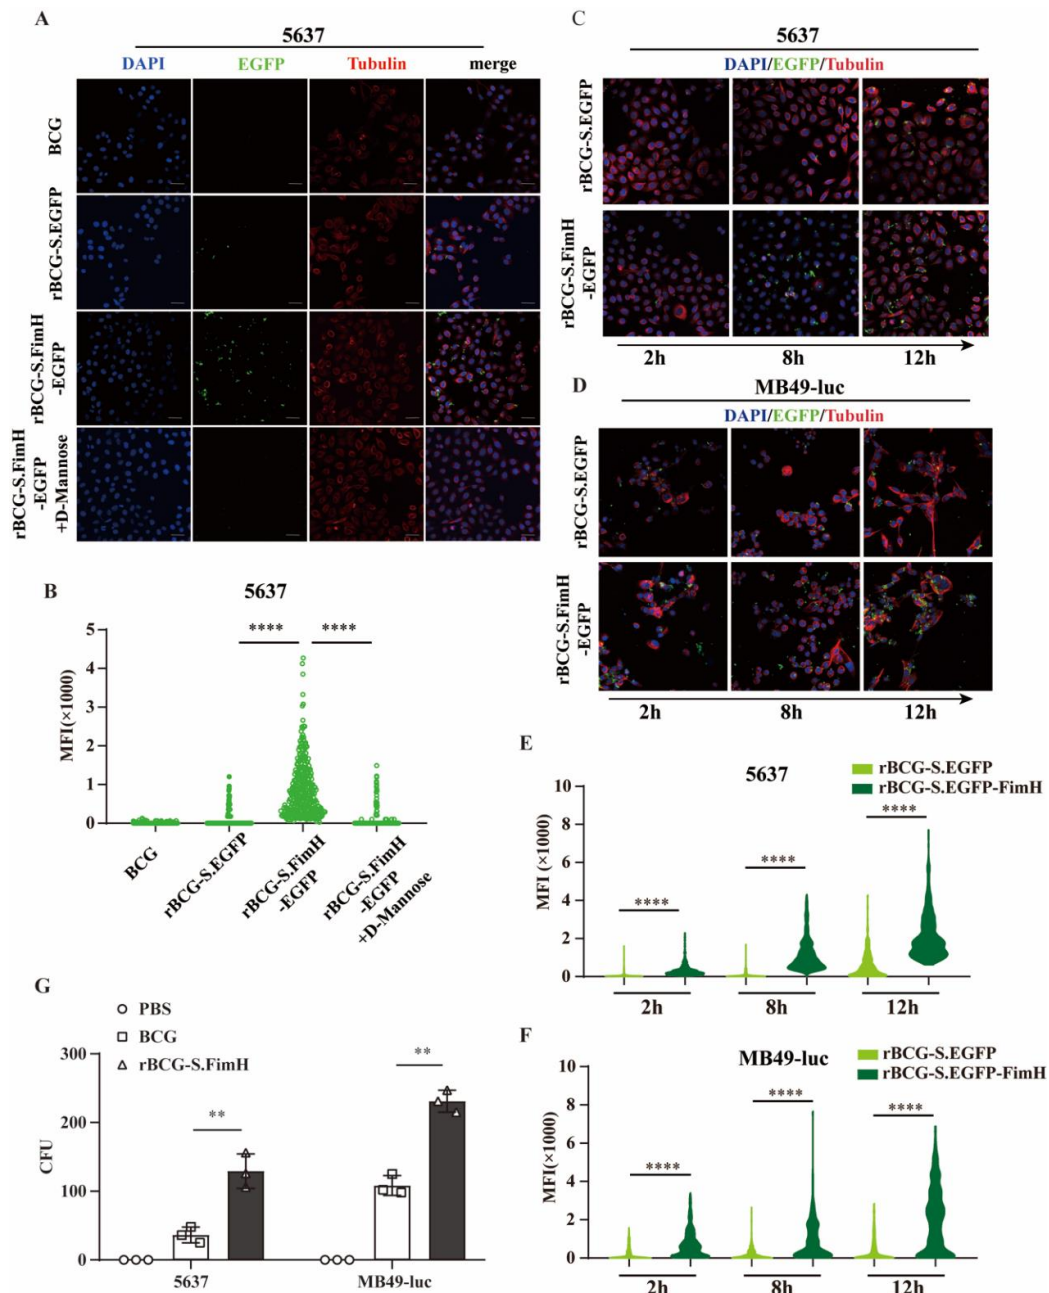

**Supplementary Figure S2. rBCG-S.FimH exhibited stronger adhesion and internalization ability *in vitro*.** (A-B) Human bladder cancer cell line 5637 was incubated with BCG, rBCG-S.EGFP and rBCG-S.FimH-EGFP with or without free D-mannose for 4 h, fluorescence images were taken by confocal (A) and fluorescence intensity quantitated using Image J (B). Scale bar: 50  $\mu$ m. (C-F) Human bladder cancer cell line 5637 (C, E) and mouse bladder cancer cell line MB49-luc (D, F) were incubated with rBCG-S.EGFP

or rBCG-S.FimH-EGFP for 2, 8, 12 hours, respectively, fluorescence images were taken by confocal (C-D) and fluorescence intensity quantitated using Image J (E-F). Scale bar: 50  $\mu\text{m}$ . (G) The amount of BCG internalized into 5637 or MB49 cells were analyzed using the colony formation unit (CFU) assay. \*\*  $p < 0.01$ , \*\*\*\*  $p < 0.0001$ .

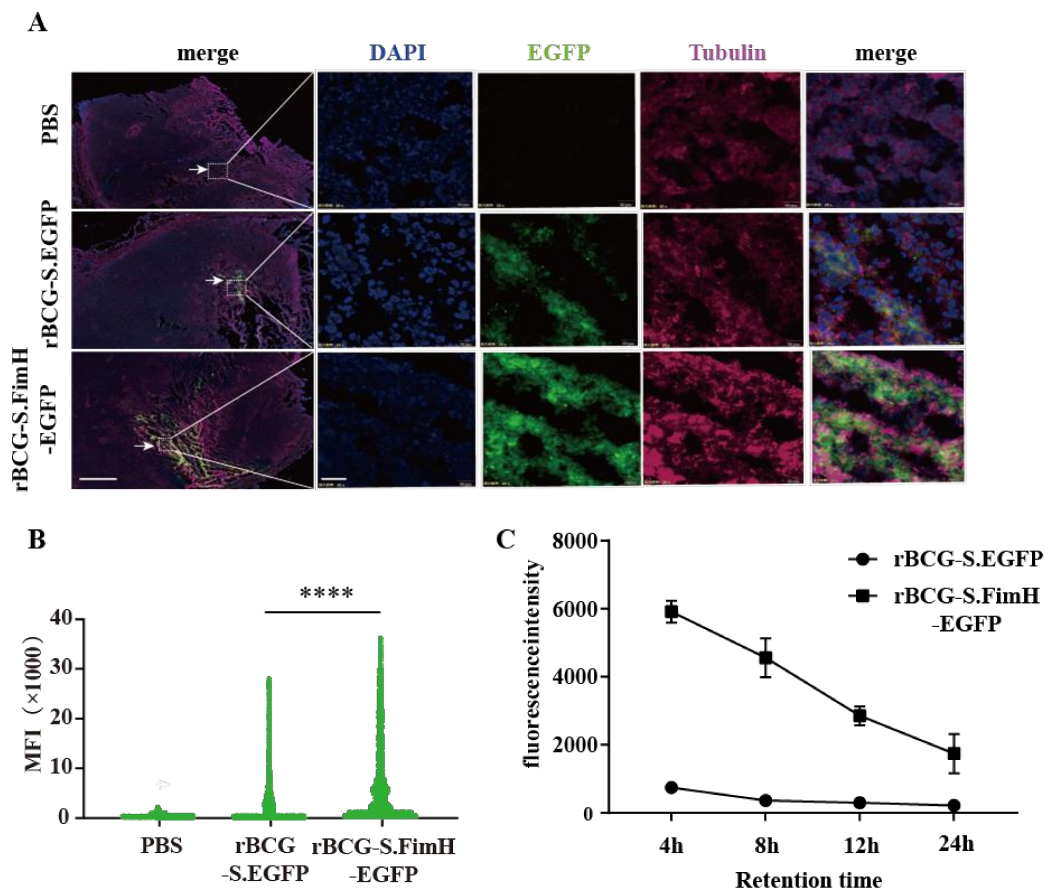

**Supplementary Figure S3. rBCG-S.FimH exhibited stronger attachment and longer retention time in orthotopic tumor-bearing mouse bladder.** (A-B) MB49-luc tumor-bearing mice were deprived of water for 8 hours, followed by intravesical injection with PBS, rBCG-S.EGFP or rBCG-S.FimH-EGFP ( $5 \times 10^5$  CFU/ml, 50  $\mu$ l/mice), the bladders were collected 4 hours later and frozen sections were subjected to immunofluorescence staining (A) and quantitation using Image J (B). Scale bar: 20  $\mu$ m. \*\*\*\*  $p < 0.0001$ . (C) rBCG-S.FimH-EGFP showed higher retention time in normal mouse bladder compared with rBCG-S.EGFP.

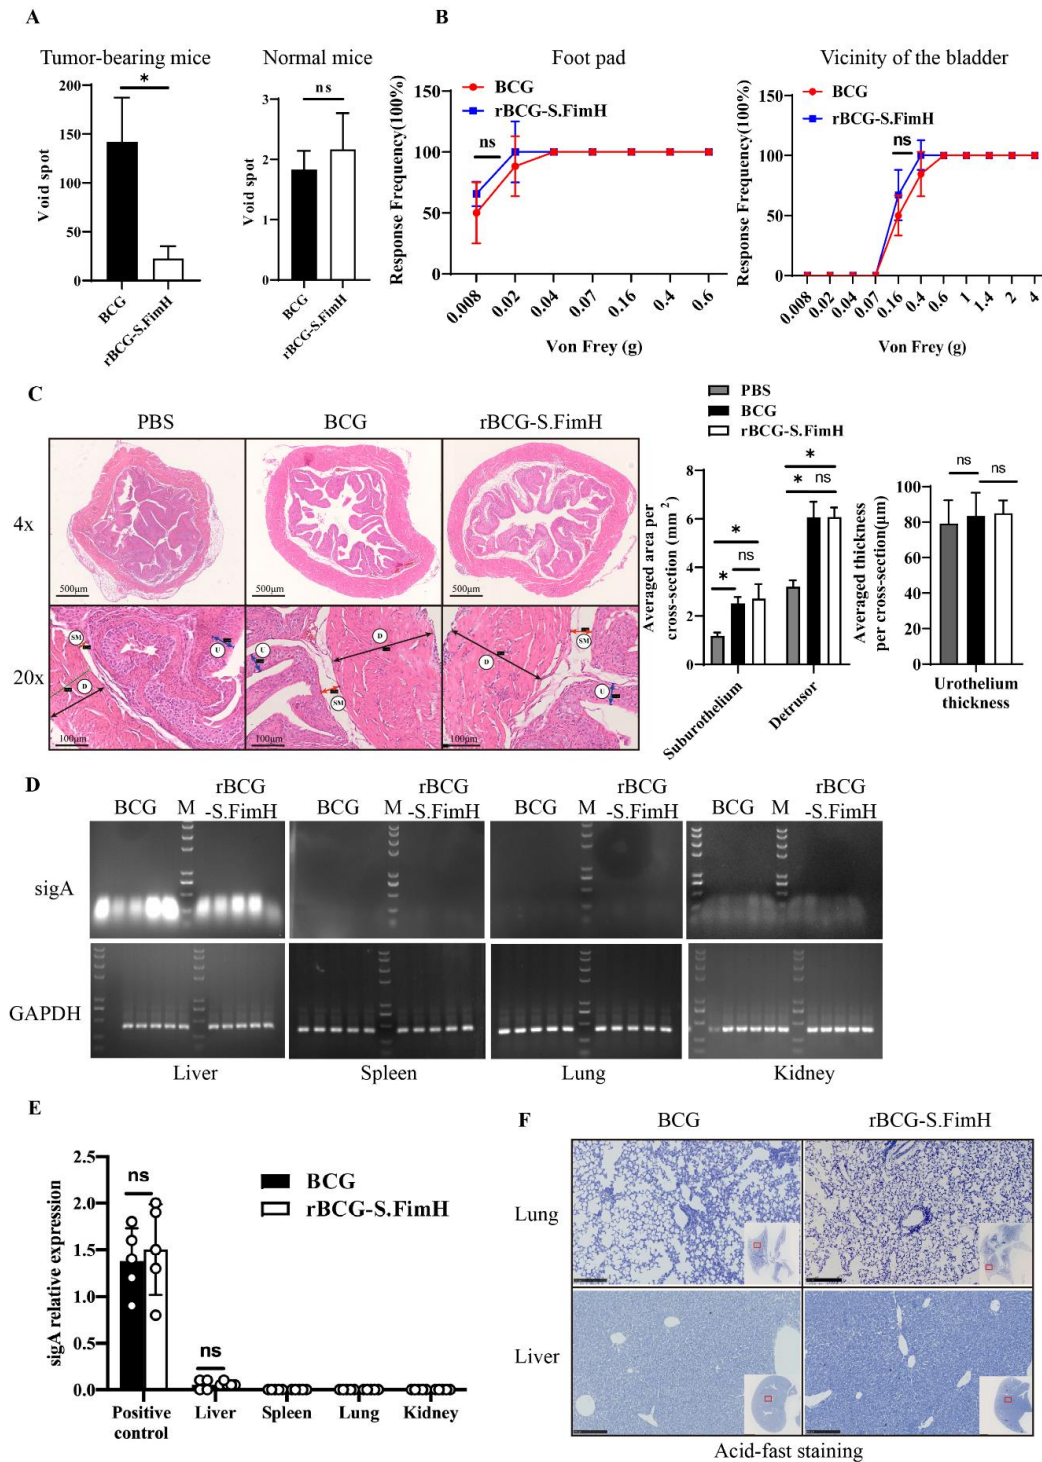

**Supplementary Figure S4. rBCG-S.FimH induced similar degree of cystitis and BCGitis in mice.** MB49-luc tumor-bearing mice or normal mice that have received a full

course of intravesical treatment with wild-type BCG or rBCG-S.FimH were compared for BCG-induced cystitis and BCGitis. **(A)** The frequency of urination was measured for 4 h using the void spot assay in both tumor-bearing mice and normal mice. **(B)** Pelvic pain in tumor-bearing mice was evaluated using the von Frey test on either the footpad or the abdominal area. **(C)** Histological analysis of the detrusor muscle, the sub-urothelial layer (including submucosa and lamina propria but excluding urothelium) and the urothelium showing similar degree of cystitis in both groups (**D**, detrusor; LP, lamina propria; SM, submucosa; U, urothelium). **(D-E)** BCG infection of mouse organs including the liver, lung, spleen and kidney was evaluated by PCR analysis of the BCG-specific gene SigA. **(F)** BCG infection of mouse organs was also evaluated using the acid-fast stain method. Scale bar: 100  $\mu\text{m}$ . \*  $p < 0.05$ .

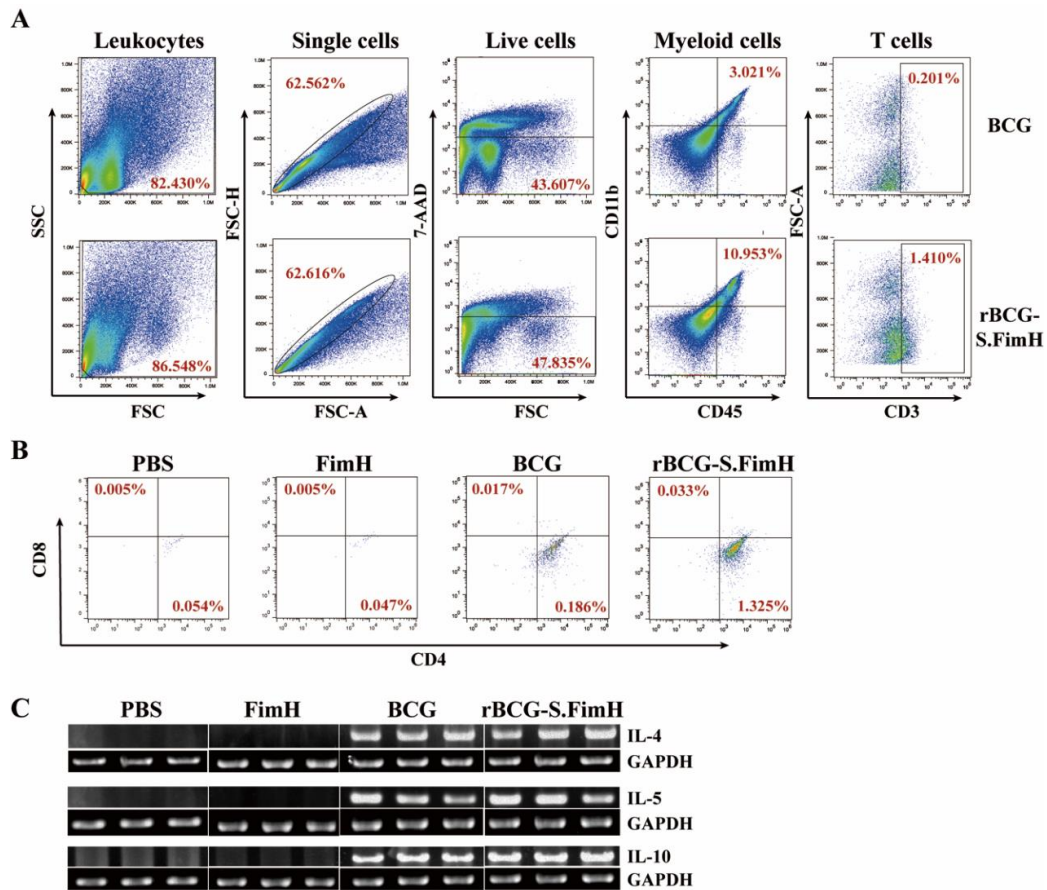

**Supplementary Figure S5. Definition of CD4 and CD8-positive T cells in the bladder.** (A) The bladders were harvested from MB49-luc tumor-bearing mice and the cells were stained with CD45, CD11b and CD3. CD45+CD11b+CD3+ live leukocytes were defined as T cells. (B) The T cells were analyzed for CD4 and CD8 expression. Representative flow data were shown. (C) Compared with BCG, rBCG-S.FimH did not enhance Th2 immune response, as represented by IL-4, IL-5, IL-10 mRNA levels in the bladder (n = 3).



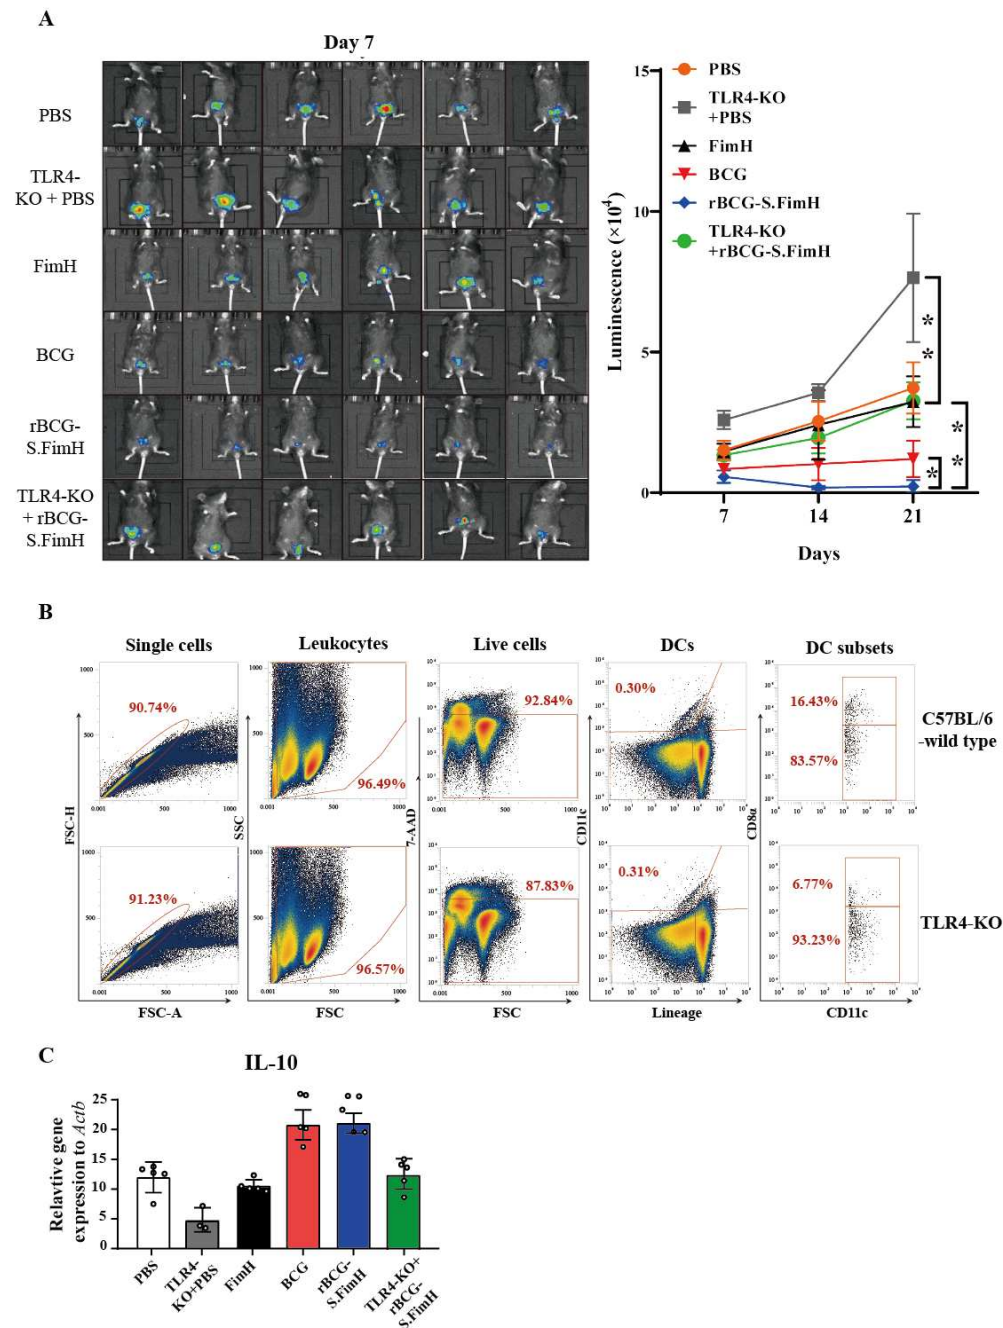

as monitored by IVIS from day 7 to day 21. **(C)** Definition of dendritic cells (DCs) in the inguinal lymph nodes. iLN was harvested from MB49-luc tumor-bearing mice and the cells were stained with lineage markers and CD11c. The lineage markers included were anti-B220, anti-CD3, anti-CD49b, anti-Gr1, anti-Thy1.1, and anti-TER-119. Lineage-CD11c<sup>+</sup> live leukocytes were defined as DCs. The DCs were further divided into CD8 $\alpha$ <sup>+</sup> and CD8 $\alpha$ <sup>-</sup> subpopulations. **(D)** MB49-luc tumor-bearing C57BL/6 and TLR4-KO mice were intravesically instilled with PBS, 2.5 mg/kg of FimH,  $2.5 \times 10^5$  CFU/ml BCG or rBCG-S.FimH twice a week for 4 weeks. The iLNs were harvested and mRNA levels of IL-10 analyzed by Q-PCR (data presented as mean  $\pm$  SD). \*  $p < 0.05$ , \*\*  $p < 0.01$ .

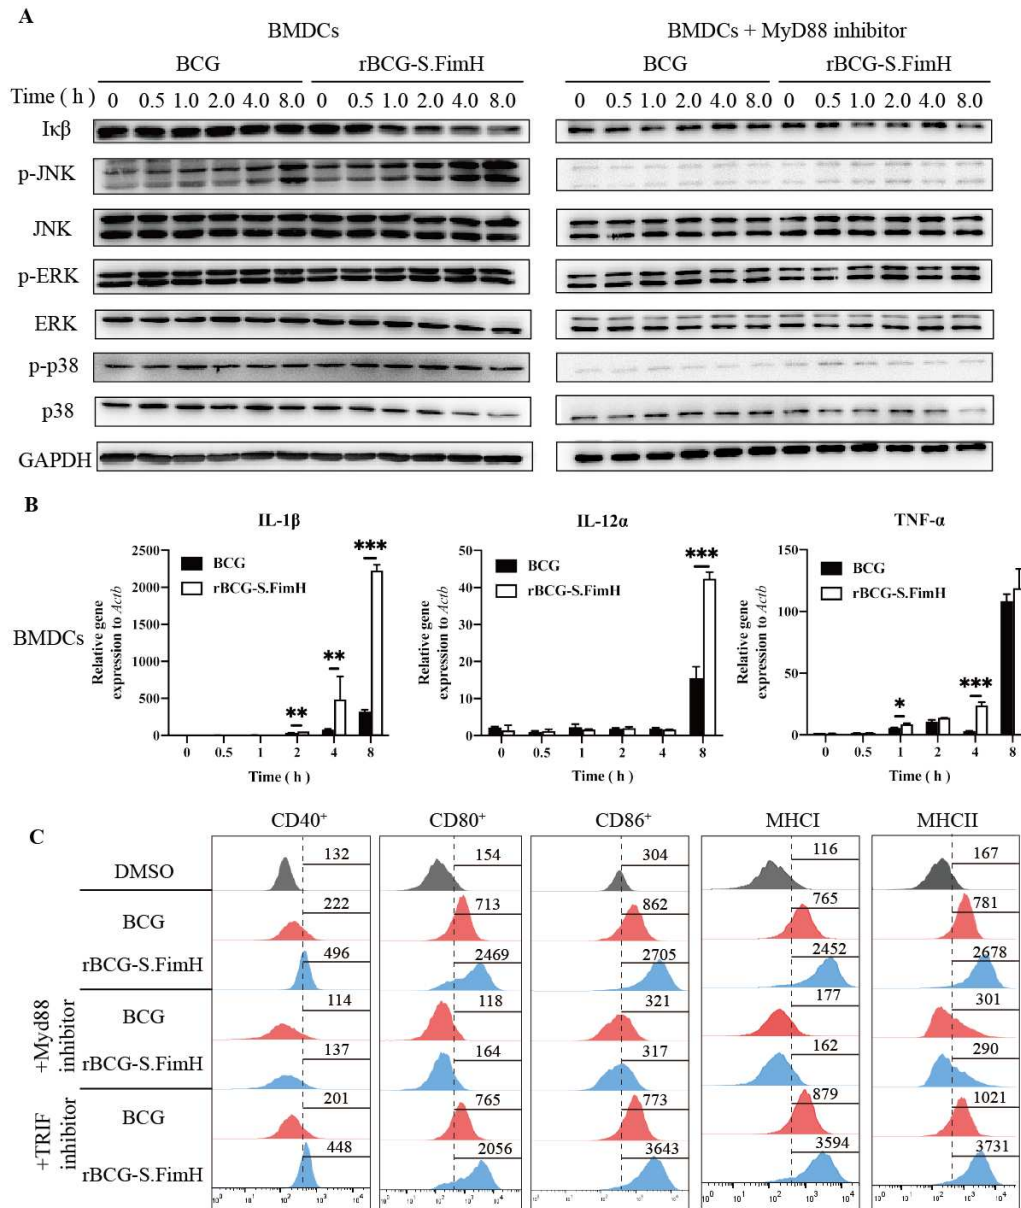

**Supplementary Figure S7. rBCG-S.FimH activated the TLR4 pathway in bone marrow-derived DC cells.** (A) Mouse bone marrow-derived DC (BMDC) cells were treated with wild-type BCG or rBCG-S.FimH in the absence or presence of MyD88 inhibitor for different times, the levels of signaling molecules downstream of TLR4 were determined by western blotting. (B) IL-1 $\beta$ , IL12 and TNF- $\alpha$  expression levels in BMDC cells were determined by RT-PCR. (C) MyD88 inhibition but not TRIF inhibition significantly blocked rBCG-S.FimH induced upregulation of CD40/CD80/CD86 and MHC I/II expression in BMDC cells. Representative flow cytometry images were shown.
